# Supplementary material
Source: publisher figshare collection journal article supplement (https://tandf.figshare.com/articles/dataset/_/7981730)
Supplement: Supplementary file 1 [file 2]

## Supplement material 2

| <u>Category</u>                         | <u>Subcategory</u>                                                                     | <u>Number of quotes</u> |
|-----------------------------------------|----------------------------------------------------------------------------------------|-------------------------|
| Purchase                                | Costs of the activity tracker <sup>(1)</sup>                                           | 14                      |
|                                         | Costs of a subscription <sup>(2)</sup>                                                 | 2                       |
|                                         | Compensation of healthcare insurance <sup>(2)</sup>                                    | 3                       |
|                                         | Possession of a smartphone <sup>(1)</sup>                                              | 7                       |
|                                         | Possession of a computer <sup>(2,3)</sup>                                              | 14                      |
|                                         | Available and clear information about the feasibility of the trackers <sup>(1,2)</sup> | 5                       |
| Instruction                             | Required instruction from physiotherapist <sup>(1,2)</sup>                             | 75                      |
|                                         | Support (helpdesk, blogs, YouTube) <sup>(2,4,5)</sup>                                  | 0                       |
|                                         | Required technical skills <sup>(2,6-8)</sup>                                           | 52                      |
| Characteristics of the activity tracker | Installing and receiving data from the activity tracker <sup>(1,5,7)</sup>             | 59                      |
|                                         | Measured variables by the activity tracker <sup>(2,3,6,7,9,10)</sup>                   | 108                     |
|                                         | Interface <sup>(5)</sup>                                                               | 1                       |
|                                         | Accessibility <sup>(2,5)</sup>                                                         | 104                     |
|                                         | Wearing comfort <sup>(1,3,5,7,8,11-13)</sup>                                           | 155                     |
|                                         | Setting goals <sup>(3,8,14,15)</sup>                                                   | 11                      |
|                                         | Complexity <sup>(2,6,8)</sup>                                                          | 131                     |
|                                         | Feedback <sup>(1,3,6-11,13)</sup>                                                      | 135                     |
|                                         | Robustness <sup>(2,5,13)</sup>                                                         | 29                      |
| Correct functioning                     | Validity <sup>(5-7,9,11-13)</sup>                                                      | 11                      |
|                                         | Reliability <sup>(5-7,9,11-13)</sup>                                                   | 30                      |
|                                         | Technical errors <sup>(2,4)</sup>                                                      | 23                      |
| Sharing data                            | Interoperational <sup>(2,3,5)</sup>                                                    | 0                       |
|                                         | Possibility to share data <sup>(2,4,7,12,14)</sup>                                     | 8                       |
| Privacy                                 | Safely sharing data <sup>(5,7,11,13)</sup>                                             | 2                       |
|                                         | Warrant of privacy <sup>(2)</sup>                                                      | 22                      |
|                                         | Insight into physical activity level by physiotherapist <sup>(11)</sup>                | 12                      |
|                                         | Authorisation, authentication, license <sup>(2)</sup>                                  | 0                       |
| Use of the activity tracker             | Implementation in physiotherapy <sup>(1,2,4)</sup>                                     | 49                      |
|                                         | Interface <sup>(5)</sup>                                                               | 0                       |
|                                         | Compliance <sup>(2,4)</sup>                                                            | 89                      |
|                                         | Setting goals <sup>(4,6,15)</sup>                                                      | 129                     |
|                                         | <b>Choice of activity tracker</b>                                                      | 30                      |
|                                         | <b>Discussing results with physiotherapist</b>                                         | 38                      |
| Interest in feedback                    | Added value of feedback <sup>(1,3,6,8-11,16)</sup>                                     | 184                     |
|                                         | Faith in measurements and measurement procedures <sup>(2,5,7,9,13)</sup>               | 39                      |

\*Subtopics in bold are added after the evaluation of the framework

### References:

1. van Bommel M, Van Gisbergen T. De eerste stap zetten. De hanteerbaarheid en toepasbaarheid van activiteitenmeters.[bachelor thesis] Heerlen (Netherlands): Zuyd University of Applied Science; 2015.

## 2. Expertmeeting

3. Armağan K, Çiğdem E. Design for physical activity: design aspects of wearable activity trackers. International Conference of Engineering Design; 2015 Jun 27-30: Milano, Italy.
4. Verwey R. Get moving! Self-management support using mobile technology. A counselling protocol extended with a web-based coaching system to promote physical activity in patients with COPD or type 2 diabetes in primary care: the It's LiFe! study. [dissertation] Maastricht: Maastricht University 2015.
5. Mancuso PJ, Thompson M, Tietze M, et al. Can Patient Use of Daily Activity Monitors Change Nurse Practitioner Practice? The Journal for Nurse Practitioners. 2014;10(10):787-793.
6. Lazar A, Koehler C, Tanenbaum J, et al. Why we use and abandon smart devices. Ubicomp; 2015 Sept 7-11: Osaka, Japan.
7. Rosenberg D, Kadokura EA, Bouldin ED, et al. Acceptability of Fitbit for physical activity tracking within clinical care among men with prostate cancer. AMIA Annu Symp Proc. 2016 Nov 4-8: Washington, USA.
8. Mercer K, Giangregorio L, Schneider E, et al. Acceptance of Commercially Available Wearable Activity Trackers Among Adults Aged Over 50 and With Chronic Illness: A Mixed-Methods Evaluation. JMIR Mhealth Uhealth. 2016;4(1):e7.
9. Fausset CB, Mitzner TL, Price CE, et al. Older Adults' Use of and Attitudes toward Activity Monitoring Technologies. Proceedings of the human factors and ergonomics society; 2013 Sep 30- Oct 4: San Diego, USA.
10. O'Brien T, Troutman-Jordan M, Hathaway D, et al. Acceptability of wristband activity trackers among community dwelling older adults. Geriatr Nurs. 2015;36(2):21-5.
11. Andrieu N, Mannens L, Nowak K. Toepasbaarheid en hanteerbaarheid van activiteitenmeters binnen de ergotherapie bij COPD-patiënten.[bachelor thesis] Heerlen: Zuyd University of Applied Science; 2015.
12. Harrison D, Marshall P, Bianchi-Berthouze N, et al. Activity tracking; Barriers, Workarounds and Customisation. Ubicomp; 2015 Sept 7-11: Osaka, Japan
13. Shih PC, Han K, Poole ES, et al. Use and Adoption Challenges of Wearable Activity Trackers. iConference; 2015 March 24-27: Newport Beach, California, USA.
14. Lyons EJ, Lewis ZH, Mayrsohn BG, et al. Behavior change techniques implemented in electronic lifestyle activity monitors: a systematic content analysis. J Med Internet Res. 2014;16(8):e192.
15. Stevens A, Beurskens A, Koke A, et al. The use of patient-specific measurement instruments in the process of goal-setting: a systematic review of available instruments and their feasibility. Clin Rehabil. 2013;27(11):1005-1019.
16. Karapanos E, Gouveia R, Hassenzahl M, et al. Wellbeing in the Making: Peoples' Experiences with Wearable Activity Trackers. Psychol Well Being. 2016;6:4.
