# Supplementary material
Source: publisher figshare collection journal article supplement (https://tandf.figshare.com/articles/dataset/_/7981730)
Supplement: Supplementary file 2 [file 2]

Archive with 2 entries (2 files):
- idre_a_1590470_sm7693.pdf
- idre_a_1590470_sm7692.pdf
