# Supplementary material
Source: publisher figshare collection journal article supplement (https://tandf.figshare.com/articles/dataset/_/7981730)
Supplement: Supplementary file 2 [file 2 › idre_a_1590470_sm7692.pdf]

## **Supplement material 1**

### **Interview Guide**

#### Introduction:

- Introduce yourself (name, function)
- Explain you would like to record this interview with a memo recorder
- Explain that everything the patients says will be used without their name
- Ask if they agree with recording the interview
- Ask if they have any question based on the information you just provided

#### Question 1:

Which activity tracker did you use?

#### Question 2:

Which information did you receive from your physiotherapist before using the activity tracker?

#### Question 3:

Can you briefly explain how you experienced the use of the activity tracker?

#### Question 4:

With witch purpose was the activity tracker used in your therapy?

*Sub question:* Did you discussed the results in with your physiotherapist?

Continue with: How did you discussed these results? OR How would you have liked to discuss these results?

*Sub question:* How can an activity tracker be used in your therapy to improve the results of the therapy?

Question 5:

Would you purchase an activity tracker?

*In case the participants wants to buy an activity tracker:*

-If you would buy an activity tracker, which information you would like to know beforehand?

-How would you want to compare this with other activity trackers? (for example wearing location, price and feasibility)

-What would be the main reason whether to buy or not buy an activity tracker?

-How would an aid to help you choose an activity tracker look appealing to you?

*In case the participants does not want to buy an activity tracker:*

-If you could borrow an activity tracker from the physiotherapist practice which information you would like to know beforehand?

-How would you want to compare this with other activity trackers? (for example wearing location, price and feasibility)

-What would be the main reason whether to buy or not buy an activity tracker?

-How would an aid to help you choose an activity tracker look appealing to you?

Question 6:

Most data of activity trackers is stored online. Do you have any objections if other people could see your data?

*Sub question:* If yes, why? If no, why not?

*Sub question* Who would be allowed to see your data and who isn't ?

Question 7:

Are there any important issues to you which we haven't discussed during this interview?
